# Supplementary material for: XpressO: An explanatory deep learning pipeline for the prediction and visualization of gene expression heterogeneity in breast tumors
Source: Research Square preprint supplement (doi:10.21203/rs.3.rs-6167948/v1), 2025-06-05
Supplement: Supplementary file 1 [file 562d4d453a1c2cd5e96b46db.xlsx]

## Sheet: Sheet3
Tissue	No.	pred_0	p_0	Pred_1	p_1
TCGA-BH-A0BP-COL11A1	C1	high_expression_genes	0.680938	low_expression_genes	0.319062
TCGA-E2-A156-COL11A1	C2	high_expression_genes	0.786127	low_expression_genes	0.213873
TCGA-E9-A1NC-COL11A1	C3	high_expression_genes	0.879304	low_expression_genes	0.120696
TCGA-AN-A0FN-COL11A1	C4	high_expression_genes	0.564458	low_expression_genes	0.435542
TCGA-E2-A159-KLK8	K1	low_expression_genes	0.639096	high_expression_genes	0.360904
TCGA-E2-A156-KLK8	K2	low_expression_genes	0.879993	high_expression_genes	0.120007
TCGA-BH-A0BM-KLK8	K3	high_expression_genes	0.685452	low_expression_genes	0.314548
TCGA-D8-A1JH-KLK8	K4	low_expression_genes	0.836123	high_expression_genes	0.163877
TCGA-BH-A0BP-MMP3	M1	low_expression_genes	0.5012	high_expression_genes	0.4988
TCGA-E2-A159-MMP3	M2	low_expression_genes	0.789299	high_expression_genes	0.210701
TCGA-E2-A150-MMP3	M3	low_expression_genes	0.57923	high_expression_genes	0.42077
TCGA-E9-A1NC-MMP3	M4	high_expression_genes	0.683022	low_expression_genes	0.316978
TCGA-E2-A15H-MMP3	M5	high_expression_genes	0.847292	low_expression_genes	0.152708
TCGA-BH-A28Q-MMP3	M6	high_expression_genes	0.65161	low_expression_genes	0.34839
TCGA-BH-A0BP-TIMP4	T1	high_expression_genes	0.778787	low_expression_genes	0.221213
TCGA-E2-A1IE-TIMP4	T2	high_expression_genes	0.842928	low_expression_genes	0.157072
TCGA-E2-A15H-TIMP4	T3	high_expression_genes	0.703637	low_expression_genes	0.296363
TCGA-D8-A1JH-TIMP4	T4	high_expression_genes	0.924712	low_expression_genes	0.075288
TCGA-E2-A15-GATA3	G1	low_expression_genes	0.878796	high_expression_genes	0.121204
TCGA-BH-A0RX-GATA3	G2	low_expression_genes	0.934066	high_expression_genes	0.0659344
TCGA-E2-A1IE-GATA3	G3	high_expression_genes	0.529926	low_expression_genes	0.470074
TCGA-BH-A0BM-GATA3	G4	high_expression_genes	0.791671	low_expression_genes	0.208329
TCGA-BH-A0DT-GATA3	G5	high_expression_genes	0.916579	low_expression_genes	0.0834205
TCGA-E2-A159-ESR1	E1	low_expression_genes	0.954947	high_expression_genes	0.0450527
TCGA-BH-A0RX-ESR1	E2	low_expression_genes	0.920605	high_expression_genes	0.0793951
TCGA-E2-A150-ESR1	E3	low_expression_genes	0.859442	high_expression_genes	0.140558
TCGA-E2-A1L8-ESR1	E4	high_expression_genes	0.765046	low_expression_genes	0.234954
TCGA-D8-A1JH-PTPRZ1	P1	low_expression_genes	0.722208	high_expression_genes	0.277792
TCGA-BH-A28Q-PTPRZ1	P2	low_expression_genes	0.679003	high_expression_genes	0.320997
TCGA-AN-A0FN-PTPRZ1	P3	high_expression_genes	0.798597	low_expression_genes	0.201403
TCGA-E2-A1L8-PTPRZ1	P4	low_expression_genes	0.932951	high_expression_genes	0.0670486
TCGA-E2-A15H-S100A7	SA1	high_expression_genes	0.726335	low_expression_genes	0.273665
TCGA-D8-A1JH-S100A7	SA2	low_expression_genes	0.603745	high_expression_genes	0.396255
TCGA-BH-A0DT-S100A7	SA3	low_expression_genes	0.513542	high_expression_genes	0.486458
TCGA-BH-A0HY-S100A7	SA4	high_expression_genes	0.862759	low_expression_genes,	0.137241
TCGA-BH-A28Q-SCGB1D2	SD1	high_expression_genes	0.732653	low_expression_genes	0.267347
TCGA-BH-A0DT-SCGB1D2	SD2	high_expression_genes	0.861182	low_expression_genes	0.138818
TCGA-BH-A0HY-SCGB1D2	SD3	low_expression_genes	0.613891	high_expression_genes	0.386109
TCGA-D8-A27V-SCGB1D2	SD4	high_expression_genes	0.851107	low_expression_genes	0.148893
